# Supplementary material for: Cost-utility analysis of adding abiraterone acetate plus prednisone/prednisolone to long-term hormone therapy in newly diagnosed advanced prostate cancer in England: Lifetime decision model based on STAMPEDE trial data
Source: PubMed Central journal article supplement (PMC9162346; doi:10.1371/journal.pone.0269192), 2022-06-02
Supplement: pone.0269192.s002.pdf [file pone.0269192.s002.pdf]

# **Cost-utility analysis of adding abiraterone acetate plus prednisone/prednisolone to long-term hormone therapy in newly diagnosed advanced prostate cancer: lifetime decision model in England based on STAMPEDE trial data**

Caroline S Clarke\*, Rachael M Hunter, Andrea Gabrio, Christopher D Brawley, Fiona C Ingleby, David P Dearnaley, David Matheson, Gerhardt Attard, Hannah L Rush, Rob J Jones, William Cross, Chris Parker, J Martin Russell, Robin Millman, Silke Gillessen, Zafar Malik, Jason F Lester, James Wylie, Noel W Clarke, Mahesh KB Parmar, Matthew R Sydes, Nicholas D James on behalf of the STAMPEDE investigators

\* Corresponding author: [caroline.clarke@ucl.ac.uk](mailto:caroline.clarke@ucl.ac.uk) (CSC), Research Department of Primary Care and Population Health, University College London, London, UK.

## **Supporting Information**

### **File 1**

#### **Relating to *Methods: Trial-based analysis methods: survival analysis* section in main manuscript**

Parametric survival curves were modelled jointly or separately for the 25 transitions using trial data [1] [2] [3] [4], to allow estimation of lifetime event rates in the lifetime model. The baseline variables assessed for model inclusion are listed in Table S1.

**Table S1. Number and description of categories for baseline patient and disease characteristics assessed for inclusion (although not necessarily included) in trial-based survival models.**

| Variable                                                                                                | Number of categories | Category descriptions               |
|---------------------------------------------------------------------------------------------------------|----------------------|-------------------------------------|
| <b>Baseline disease status</b>                                                                          |                      |                                     |
| Tumour stage (T)                                                                                        | 4                    | ≤T2   T3   T4   TX                  |
| Lymph node status (N)                                                                                   | 3                    | N0   N+   NX                        |
| Metastasis (M)                                                                                          | 2                    | M0, M1 lymph   M1 bone, visceral    |
| Visceral metastasis                                                                                     | 2                    | Y   N                               |
| Lymph node metastasis                                                                                   | 2                    | Y   N                               |
| Gleason score                                                                                           | 3                    | ≤7   ≥8   unknown (higher is worse) |
| WHO performance status                                                                                  | 2                    | 0   1 or 2 (higher is worse)        |
| Prostate specific antigen level                                                                         | 5                    | Quintiles (higher is worse)         |
| Radiotherapy plans                                                                                      | 2                    | Planned   not planned               |
| <b>Demographics</b>                                                                                     |                      |                                     |
| Age group (years)                                                                                       | 4                    | <60   60-64   65-69   ≥70           |
| <b>Treatment Pathway changes</b>                                                                        |                      |                                     |
| Geography                                                                                               | 2                    | England   not England               |
| Arm H open                                                                                              | 2                    | Before arm H   during arm H         |
| <b>Transitions in model of time to first event</b>                                                      |                      |                                     |
| From HS1-3 to HS8, i.e. first event is death from prostate cancer                                       | 2                    | Y   N                               |
| From HS1/1/2 to HS5/7/7 respectively, i.e. first event is disease progression with worsening metastases | 2                    | Y   N                               |

## References

- [1] N. Latimer, “Survival Analysis for Economic Evaluations Alongside Clinical Trials—Extrapolation with Patient-Level Data: Inconsistencies, Limitations, and a Practical Guide,” *Medical Decision Making*, vol. 33, no. 6, pp. 743-754, 2013.
- [2] C. Williams, J. Lewsey, A. Briggs and D. Mackay, “Cost-Effectiveness Analysis in R Using a Multi-state Modeling Survival Analysis Framework: A Tutorial,” *Medical Decision Making*, vol. 37, no. 4, pp. 340-352, 2016.
- [3] H. Putter, “Special Issue about Competing Risks and Multi-State Models,” *Journal of Statistical Software*, vol. 38, no. 1, 2011.
- [4] H. Putter, J. van der Hage, G. de Bock, R. Elgalta and C. van de Velde, “Estimation and Prediction in a Multi-State Model for Breast Cancer,” *Biometrical Journal*, vol. 48, no. 3, pp. 366-380, 2006.
