# Supplementary material for: Cost-utility analysis of adding abiraterone acetate plus prednisone/prednisolone to long-term hormone therapy in newly diagnosed advanced prostate cancer in England: Lifetime decision model based on STAMPEDE trial data
Source: PubMed Central journal article supplement (PMC9162346; doi:10.1371/journal.pone.0269192), 2022-06-02
Supplement: pone.0269192.s006.pdf [file pone.0269192.s006.pdf]

# **Cost-utility analysis of adding abiraterone acetate plus prednisone/prednisolone to long-term hormone therapy in newly diagnosed advanced prostate cancer: lifetime decision model in England based on STAMPEDE trial data**

Caroline S Clarke\*, Rachael M Hunter, Andrea Gabrio, Christopher D Brawley, Fiona C Ingleby, David P Dearnaley, David Matheson, Gerhardt Attard, Hannah L Rush, Rob J Jones, William Cross, Chris Parker, J Martin Russell, Robin Millman, Silke Gillessen, Zafar Malik, Jason F Lester, James Wylie, Noel W Clarke, Mahesh KB Parmar, Matthew R Sydes, Nicholas D James on behalf of the STAMPEDE investigators

\* Corresponding author: [caroline.clarke@ucl.ac.uk](mailto:caroline.clarke@ucl.ac.uk) (CSC), Research Department of Primary Care and Population Health, University College London, London, UK.

## **Supporting Information**

### **File 5**

#### **Relating to *Results: Trial-based results: Utilities* section in the main manuscript**

Fig S1 shows how the mean, unimputed utility score changed over time in each arm. Sample size at later timepoints was small, partly due to data not being routinely collected after progression, hence the apparent fluctuations from 182 weeks onwards. Despite the protocol not requiring EQ-5D-3L to be collected after progression, some patients did report this information, allowing utility scores to be modelled using only trial data.

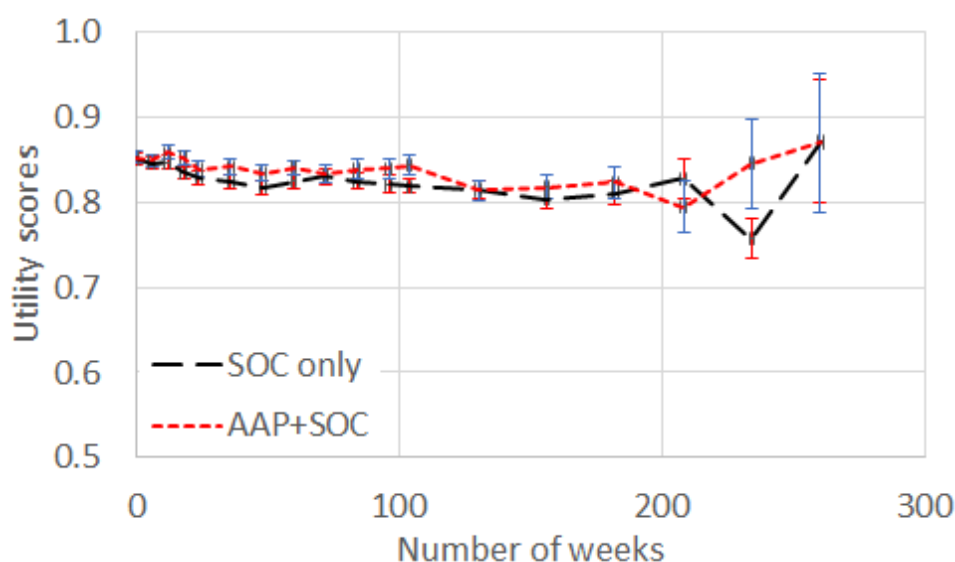

| Weeks           | 0   | 6   | 12  | 18  | 24  | 36  | 48  | 60  | 72  | 84  | 96  | 104 | 130 | 156 | 182 | 208 | 234 | 260 |
|-----------------|-----|-----|-----|-----|-----|-----|-----|-----|-----|-----|-----|-----|-----|-----|-----|-----|-----|-----|
| <b>AAP+SOC</b>  | 647 | 633 | 625 | 582 | 631 | 603 | 598 | 585 | 563 | 529 | 491 | 532 | 494 | 421 | 245 | 128 | 49  | 12  |
| <b>SOC-only</b> | 628 | 653 | 598 | 568 | 594 | 599 | 573 | 522 | 493 | 463 | 405 | 444 | 412 | 324 | 172 | 76  | 39  | 10  |

**Fig S1. Mean undiscounted utility scores per arm and timepoint for alive patients; the table provides information on the sample size at each timepoint used to calculate these scores. Short-dotted (red) line is AAP+SOC, and long-dashed (black) line is SOC-only. Responses were assigned to the closest listed week according to the date on which the data were collected.**

**Table S19. Unimputed trial utility scores by arm and health state.** HS1 and HS4 contain only M0 subgroup patients; HS2 and HS3 contain only M1 subgroup patients; and HS5-7 contain a mixture of the two subgroups.

| Utility scores | AAP+SOC arm |       |       | SOC-only arm |       |       |
|----------------|-------------|-------|-------|--------------|-------|-------|
|                | n           | Mean  | SD    | n            | Mean  | SD    |
| <b>HS1</b>     | 4595        | 0.846 | 0.203 | 3786         | 0.857 | 0.202 |
| <b>HS2</b>     | 3140        | 0.846 | 0.193 | 2097         | 0.832 | 0.214 |
| <b>HS3</b>     | 270         | 0.771 | 0.289 | 206          | 0.823 | 0.212 |
| <b>HS4</b>     | 49          | 0.758 | 0.249 | 450          | 0.821 | 0.228 |
| <b>HS5</b>     | 260         | 0.761 | 0.220 | 903          | 0.739 | 0.266 |
| <b>HS6</b>     | 29          | 0.693 | 0.324 | 63           | 0.655 | 0.274 |
| <b>HS7</b>     | 25          | 0.783 | 0.277 | 68           | 0.645 | 0.304 |

**Table S20. Utility scores and missingness patterns in trial data in AAP+SOC arm.**

|                | Numbers of patients |      |         | Unimputed trial utility scores |           |        |     |
|----------------|---------------------|------|---------|--------------------------------|-----------|--------|-----|
|                | Total               | Dead | Missing | Mean                           | Std. Dev. | Min    | Max |
| All timepoints | 898                 | 0    | 0       | 0.839                          | 0.205     | -0.248 | 1   |
| 0 weeks        | 647                 | 0    | 251     | 0.853                          | 0.181     | -0.181 | 1   |
| 6 weeks        | 633                 | 0    | 265     | 0.849                          | 0.198     | -0.184 | 1   |
| 12 weeks       | 625                 | 1    | 272     | 0.858                          | 0.190     | -0.239 | 1   |
| 18 weeks       | 582                 | 3    | 313     | 0.853                          | 0.180     | -0.074 | 1   |
| 24 weeks       | 631                 | 5    | 262     | 0.838                          | 0.207     | -0.239 | 1   |
| 36 weeks       | 603                 | 8    | 287     | 0.842                          | 0.206     | -0.239 | 1   |
| 48 weeks       | 598                 | 18   | 282     | 0.834                          | 0.203     | -0.077 | 1   |
| 60 weeks       | 585                 | 31   | 282     | 0.841                          | 0.206     | -0.239 | 1   |
| 72 weeks       | 563                 | 42   | 293     | 0.833                          | 0.220     | -0.239 | 1   |
| 84 weeks       | 529                 | 67   | 302     | 0.839                          | 0.201     | -0.248 | 1   |
| 96 weeks       | 491                 | 77   | 330     | 0.840                          | 0.211     | -0.135 | 1   |
| 104 weeks      | 532                 | 89   | 277     | 0.843                          | 0.201     | -0.239 | 1   |
| 130 weeks      | 494                 | 121  | 283     | 0.814                          | 0.232     | -0.239 | 1   |
| 156 weeks      | 421                 | 155  | 322     | 0.818                          | 0.225     | -0.239 | 1   |
| 182 weeks      | 245                 | 169  | 484     | 0.823                          | 0.221     | -0.239 | 1   |
| 208 weeks      | 128                 | 181  | 589     | 0.794                          | 0.263     | -0.074 | 1   |
| 234 weeks      | 49                  | 183  | 666     | 0.845                          | 0.164     | 0.487  | 1   |
| 260 weeks      | 12                  | 184  | 702     | 0.870                          | 0.249     | 0.189  | 1   |

**Table S21. Utility scores and missingness patterns in trial data in SOC-only arm.**

|                | Numbers of patients |      |         | Unimputed trial utility scores |           |        |     |
|----------------|---------------------|------|---------|--------------------------------|-----------|--------|-----|
|                | Total               | Dead | Missing | Mean                           | Std. Dev. | Min    | Max |
| All timepoints | 896                 | 0    | 0       | 0.829                          | 0.222     | -0.429 | 1   |
| 0 weeks        | 628                 | 0    | 268     | 0.851                          | 0.191     | -0.181 | 1   |
| 6 weeks        | 653                 | 0    | 243     | 0.846                          | 0.194     | -0.239 | 1   |
| 12 weeks       | 598                 | 3    | 295     | 0.847                          | 0.197     | -0.181 | 1   |
| 18 weeks       | 568                 | 7    | 321     | 0.835                          | 0.201     | -0.074 | 1   |
| 24 weeks       | 594                 | 12   | 290     | 0.829                          | 0.231     | -0.181 | 1   |
| 36 weeks       | 599                 | 23   | 274     | 0.825                          | 0.226     | -0.239 | 1   |
| 48 weeks       | 573                 | 35   | 288     | 0.817                          | 0.224     | -0.349 | 1   |
| 60 weeks       | 522                 | 45   | 329     | 0.824                          | 0.207     | -0.074 | 1   |
| 72 weeks       | 493                 | 65   | 338     | 0.830                          | 0.223     | -0.239 | 1   |
| 84 weeks       | 463                 | 87   | 346     | 0.825                          | 0.231     | -0.181 | 1   |
| 96 weeks       | 405                 | 107  | 384     | 0.822                          | 0.232     | -0.239 | 1   |
| 104 weeks      | 444                 | 125  | 327     | 0.819                          | 0.245     | -0.239 | 1   |
| 130 weeks      | 412                 | 159  | 325     | 0.815                          | 0.251     | -0.429 | 1   |
| 156 weeks      | 324                 | 217  | 355     | 0.804                          | 0.249     | -0.239 | 1   |
| 182 weeks      | 172                 | 238  | 486     | 0.810                          | 0.252     | -0.181 | 1   |
| 208 weeks      | 76                  | 253  | 567     | 0.828                          | 0.263     | -0.349 | 1   |
| 234 weeks      | 39                  | 261  | 596     | 0.757                          | 0.324     | -0.170 | 1   |
| 260 weeks      | 10                  | 262  | 624     | 0.871                          | 0.260     | 0.189  | 1   |

**Table S22. Regression parameters from two-part regression of utility scores using trial data.**

|                                                    | Odds ratio from first part of regression model | QOL decrement from second part of regression model |
|----------------------------------------------------|------------------------------------------------|----------------------------------------------------|
|                                                    | Mean (95% CI)                                  | Mean (95% CI)                                      |
| <b>Constant (odds)</b>                             | 0.41 (0.36, 0.46)*                             | 0.43 (0.30, 0.56)*                                 |
| <b>WHO status (ref. cat. = 0)</b>                  |                                                |                                                    |
| 1 and 2                                            | 0.72 (0.66, 0.78)*                             | 0.07 (0.05, 0.08)*                                 |
| <b>Age (ref. cat. = ≤60 years)</b>                 |                                                |                                                    |
| 60-64                                              | 1.13 (1.06, 1.21)*                             | -0.02 (-0.04, 0.00)                                |
| 65-69                                              | 1.31 (1.21, 1.42)*                             | -0.05 (-0.07, -0.03)*                              |
| ≥70                                                | 1.30 (1.21, 1.40)*                             | -0.06 (-0.08, -0.04)*                              |
| <b>Nodal status (ref. cat. = N0)</b>               |                                                |                                                    |
| N+                                                 | 0.97 (0.93, 1.00)                              | 0.00 (-0.01, 0.02)                                 |
| NX (unknown)                                       | 1.03 (0.94, 1.12)                              | 0.00 (-0.03, 0.03)                                 |
| <b>Treatment (ref. cat. = second year onwards)</b> |                                                |                                                    |
| First year on SOC                                  | 0.99 (0.74, 1.32)                              | -0.06 (-0.21, 0.09)                                |
| First year on AAP+SOC                              | 1.03 (0.86, 1.25)                              | -0.10 (-0.28, 0.09)                                |
| <b>Health state (ref. cat. HS1)</b>                |                                                |                                                    |
| HS2                                                | 0.96 (0.92, 0.99)*                             | -0.01 (-0.02, 0.01)                                |
| HS3                                                | 0.93 (0.81, 1.06)                              | -0.01 (-0.06, 0.04)                                |
| HS4                                                | 0.90 (0.80, 1.02)                              | 0.05 (-0.01, 0.12)                                 |
| HS5                                                | 0.70 (0.59, 0.84)*                             | 0.06 (0.02, 0.10)*                                 |
| HS6                                                | 0.63 (0.38, 1.04)                              | 0.10 (0.02, 0.18)*                                 |
| HS7                                                | 0.54 (0.39, 0.74)*                             | 0.10 (0.05, 0.15)*                                 |

\* indicates statistical significance at the 5% level

## Deterministic sensitivity analysis of trial utilities

Fig S2 shows a Tornado diagram of the estimated mean (95% CI) for the combined coefficients of the two-part regression model, generating using bootstrapping, to explore how baseline covariates predict quality of life. The reference categories are: node negative, younger than 60 years, WHO performance status 0, hormone naïve M0, and EQ-5D-3L collected more than a year after randomisation. This analysis suggests that older patients have better quality of life, which agrees with published work suggesting that patients who are older at diagnosis (and therefore at entry into STAMPEDE) have less severe disease. Other disease severity markers, including health states and WHO performance status, show that worse disease coincides with lower utility score, thus validating the model. The three-category “treatment in first year” parameter result here suggests that utility could be slightly better in AAP+SOC arm in the first year, and SOC-only arm in the first year, although this inference is not statistically significant due to wide confidence intervals.

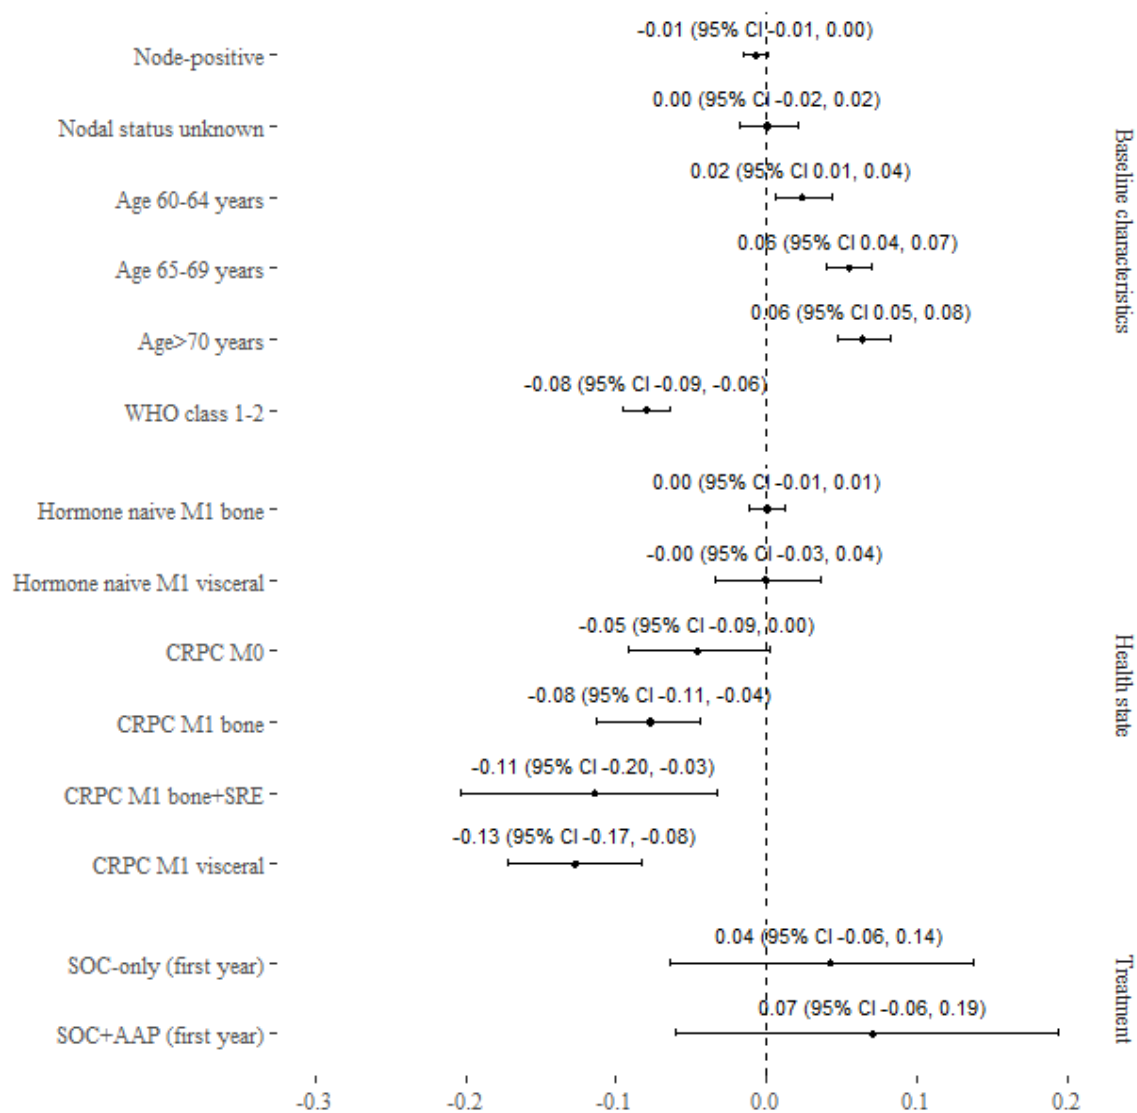

**Fig S2: Deterministic sensitivity analysis.** Impact of baseline characteristics, health state and treatment allocation on patient health-related quality of life scores in STAMPEDE.

**Table S23. Imputed trial utility data.** Data from the imputation that was used in the two-part regression are in the left-hand half of this table, and values predicted via this regression are presented in the right-hand half of this table.

| Utility scores | Imputed trial data (one imputation) |       |          |       | Predicted using two-part regression of trial data |       |          |       |
|----------------|-------------------------------------|-------|----------|-------|---------------------------------------------------|-------|----------|-------|
|                | AAP+SOC                             |       | SOC-only |       | AAP+SOC                                           |       | SOC-only |       |
|                | Mean                                | SD    | Mean     | SD    | Mean                                              | SD    | Mean     | SD    |
| HS1            | 0.782                               | 0.297 | 0.779    | 0.311 | 0.764                                             | 0.057 | 0.801    | 0.040 |
| HS2            | 0.780                               | 0.290 | 0.756    | 0.315 | 0.754                                             | 0.059 | 0.796    | 0.042 |
| HS3            | 0.748                               | 0.307 | 0.820    | 0.233 | 0.770                                             | 0.060 | 0.802    | 0.044 |
| HS4            | 0.752                               | 0.303 | 0.742    | 0.329 | 0.716                                             | 0.064 | 0.744    | 0.036 |
| HS5            | 0.771                               | 0.259 | 0.673    | 0.350 | 0.685                                             | 0.054 | 0.698    | 0.045 |
| HS6            | 0.745                               | 0.298 | 0.604    | 0.371 | 0.668                                             | 0.044 | 0.650    | 0.052 |
| HS7            | 0.759                               | 0.292 | 0.598    | 0.364 | 0.632                                             | 0.060 | 0.654    | 0.036 |
