# Supplementary material for: Cost-utility analysis of adding abiraterone acetate plus prednisone/prednisolone to long-term hormone therapy in newly diagnosed advanced prostate cancer in England: Lifetime decision model based on STAMPEDE trial data
Source: PubMed Central journal article supplement (PMC9162346; doi:10.1371/journal.pone.0269192), 2022-06-02
Supplement: pone.0269192.s009.pdf [file pone.0269192.s009.pdf]

# Cost-utility analysis of adding abiraterone acetate plus prednisone/prednisolone to long-term hormone therapy in newly diagnosed advanced prostate cancer: lifetime decision model in England based on STAMPEDE trial data

Caroline S Clarke\*, Rachael M Hunter, Andrea Gabrio, Christopher D Brawley, Fiona C Ingleby, David P Dearnaley, David Matheson, Gerhardt Attard, Hannah L Rush, Rob J Jones, William Cross, Chris Parker, J Martin Russell, Robin Millman, Silke Gillissen, Zafar Malik, Jason F Lester, James Wylie, Noel W Clarke, Mahesh KB Parmar, Matthew R Sydes, Nicholas D James on behalf of the STAMPEDE investigators

\* Corresponding author: [caroline.clarke@ucl.ac.uk](mailto:caroline.clarke@ucl.ac.uk) (CSC), Research Department of Primary Care and Population Health, University College London, London, UK.

## Supporting Information

### File 8

#### Relating to *Results: Headline results from overall lifetime model section* in the main manuscript

Table S29 shows utility scores estimated using the base case deterministic lifetime simulation, by health state, subgroup and arm. The lifetime QALY results from the base case deterministic lifetime simulation are summarised in Table S30 below. The base-case discounted lifetime costs are summarised in Table S31, split according to cost categories.

**Table S29. Utility scores estimated by the lifetime simulation model, split by health state, subgroup and arm, with missing values imputed using MICE.**

|                | HS1   | HS2   | HS3   | HS4   | HS5   | HS6   | HS7   |
|----------------|-------|-------|-------|-------|-------|-------|-------|
| M1 AAP+SOC     | -     | 0.715 | 0.705 | -     | 0.638 | 0.601 | 0.587 |
| M1 SOC-only    | -     | 0.715 | 0.705 | -     | 0.638 | 0.601 | 0.588 |
| M0 AAP+SOC     | 0.722 | -     | -     | 0.677 | 0.643 | 0.605 | 0.592 |
| M0 SOC-only    | 0.722 | -     | -     | 0.677 | 0.646 | 0.609 | 0.596 |
| AAP+SOC (all)  | 0.722 | 0.715 | 0.705 | 0.677 | 0.641 | 0.603 | 0.589 |
| SOC-only (all) | 0.722 | 0.715 | 0.705 | 0.677 | 0.643 | 0.605 | 0.592 |
| All            | 0.722 | 0.715 | 0.705 | 0.677 | 0.642 | 0.604 | 0.591 |

**Table S30. Estimated discounted lifetime mean QALYs, split by arm and subgroup, and grouped by hormone-naïve vs. CRPC health states, calculated using the lifetime simulation model.**

|                                     | M0 subgroup |             |             | M1 subgroup |             |             |
|-------------------------------------|-------------|-------------|-------------|-------------|-------------|-------------|
|                                     | AAP+SOC     | SOC-only    | Difference  | AAP+SOC     | SOC-only    | Difference  |
| <b>QALYs (discounted):</b>          |             |             |             |             |             |             |
| Hormone-naïve health states (HS1-3) | 6.72        | 4.72        | 2.01        | 3.79        | 1.65        | 2.14        |
| CRPC health states (HS4-7)          | 0.31        | 1.99        | -1.68       | 0.64        | 1.30        | -0.66       |
| <b>Total lifetime QALYs</b>         | <b>7.03</b> | <b>6.70</b> | <b>0.33</b> | <b>4.43</b> | <b>2.95</b> | <b>1.48</b> |

**Table S31. Per-patient costs split by arm and subgroup, for the various cost categories used in the lifetime simulation model, calculated using the deterministic base case analysis.**

|                                    | M0 subgroup   |               |               | M1 subgroup    |               |               |
|------------------------------------|---------------|---------------|---------------|----------------|---------------|---------------|
|                                    | AAP+SOC       | SOC-only      | Difference    | AAP+SOC        | SOC-only      | Difference    |
| AAP incl. monitoring               | 69,573        | 10,302        | 59,271        | 91,862         | 16,971        | 74,892        |
| Monitoring (except AAP)            | 2,923         | 4,395         | -1,472        | 1,294          | 1,350         | -56           |
| Group of four specific medications | 1,342         | 4,678         | -3,336        | 5,134          | 9,660         | -4,525        |
| General disease management         | 21,985        | 26,952        | -4,968        | 14,001         | 12,883        | 1,118         |
| Serious adverse events (SAEs)      | 396           | 226           | 170           | 396            | 226           | 170           |
| End of life care                   | 1,340         | 2,184         | -844          | 3,969          | 5,321         | -1,352        |
| <b>Total lifetime costs</b>        | <b>97,558</b> | <b>48,736</b> | <b>48,821</b> | <b>116,658</b> | <b>46,412</b> | <b>70,246</b> |
